# Supplementary material
Source: publisher site journal article supplement (https://www.dovepress.com/get_supplementary_file.php?f=358730.docx)
Supplement: Supplementary file 1 [file get_supplementary_file.php]

Table S1. Primers used in our study

| Target | Primers | Sequence（5’-3’） | Length | Reference |
| --- | --- | --- | --- | --- |
| *silE* | *silE*-f | AGGGGAAACGGTCTGACTTC | 221 | 1 |
| *silE*-r | ATATCCATGAGCGGGTCAAC |
| *silR*a | *silR*-f1 | TCGTGGGCGCAATAGAATGA | 757 | this study |
| *silR*-r1 | AGCGAGTGAGAAAGGTCGTC |
| *silCBA* | *silCBA*-f | CGGGAAACGCTGAAAAATTA | 189 | 1 |
| *silCBA*-r | GTACGTTCCCAGCACCAGTT |
| *silF* | *silF*-f | CGATATGAATGCTGCCAGTG | 229 | 1 |
| *silF*-r | ATTGCCCTGCTGAATAAACG |
| *silB* | *silB*-f | CAAAGAACAGCGCGTGATTA | 232 | 1 |
| *silB*-r | GCTCAGACATTGCTGGCATA |
| *silA* | *silA*-f | CTTGAGCATGCCAACAAGAA | 162 | 1 |
| *silA*-r | CCTGCCAGTACAGGAACCAT |
| *silP* | *silP*-f | CCTGGGTTTACAGCGTCATT | 172 | 1 |
| *silP*-r | ATGGCACCTGAGGTTTGTTC |
| *silS*b | *silS*-f1 | AGCGACTCCGCGCTAAAATA | 1620 | 2 |
| *silS*-r1 | GGCTTCTGTTTGCTGCATGA |
| *silRS* | *silRS*-f | GGCAATCGCAATCAGATTTT | 189 | 1 |
| *silRS*-r | GTGGAGGATACTGCGAGAGC |
| *silS*c | *silS*-f2 | AAGCGACTCCGCGCTAAAAT | 1747 | this study |
| *silS*-f2 | GAAACAGGTTCGGCAGTGTT |
| *ompK35* | *ompK35*-f | TTGCCCTTATCCGGTGGAAC | 1448 | this study |
| *ompK35*-r | CGACAAAAAGCGCGAAGGTTT |
| *ompK36* | *ompK36*-f | CCGGTTGAAATAGGGGTAAACAGAC | 1631 | 3 |
| *ompK36*-r | CCATTAATCGAGGCTCCTCTTACCA |

a. Full sequence of *silR*

b. Full sequence of *silS*

c. Primer silS-2 was used to detect the full sequence of *silS* gene for strains WHC181, which was negative in PCR with primer silS-1


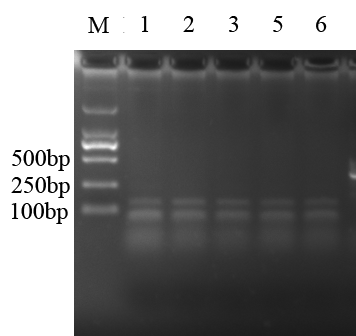


Figure S1 the ERIC-PCR results of five strains of *K. pneumoniae*


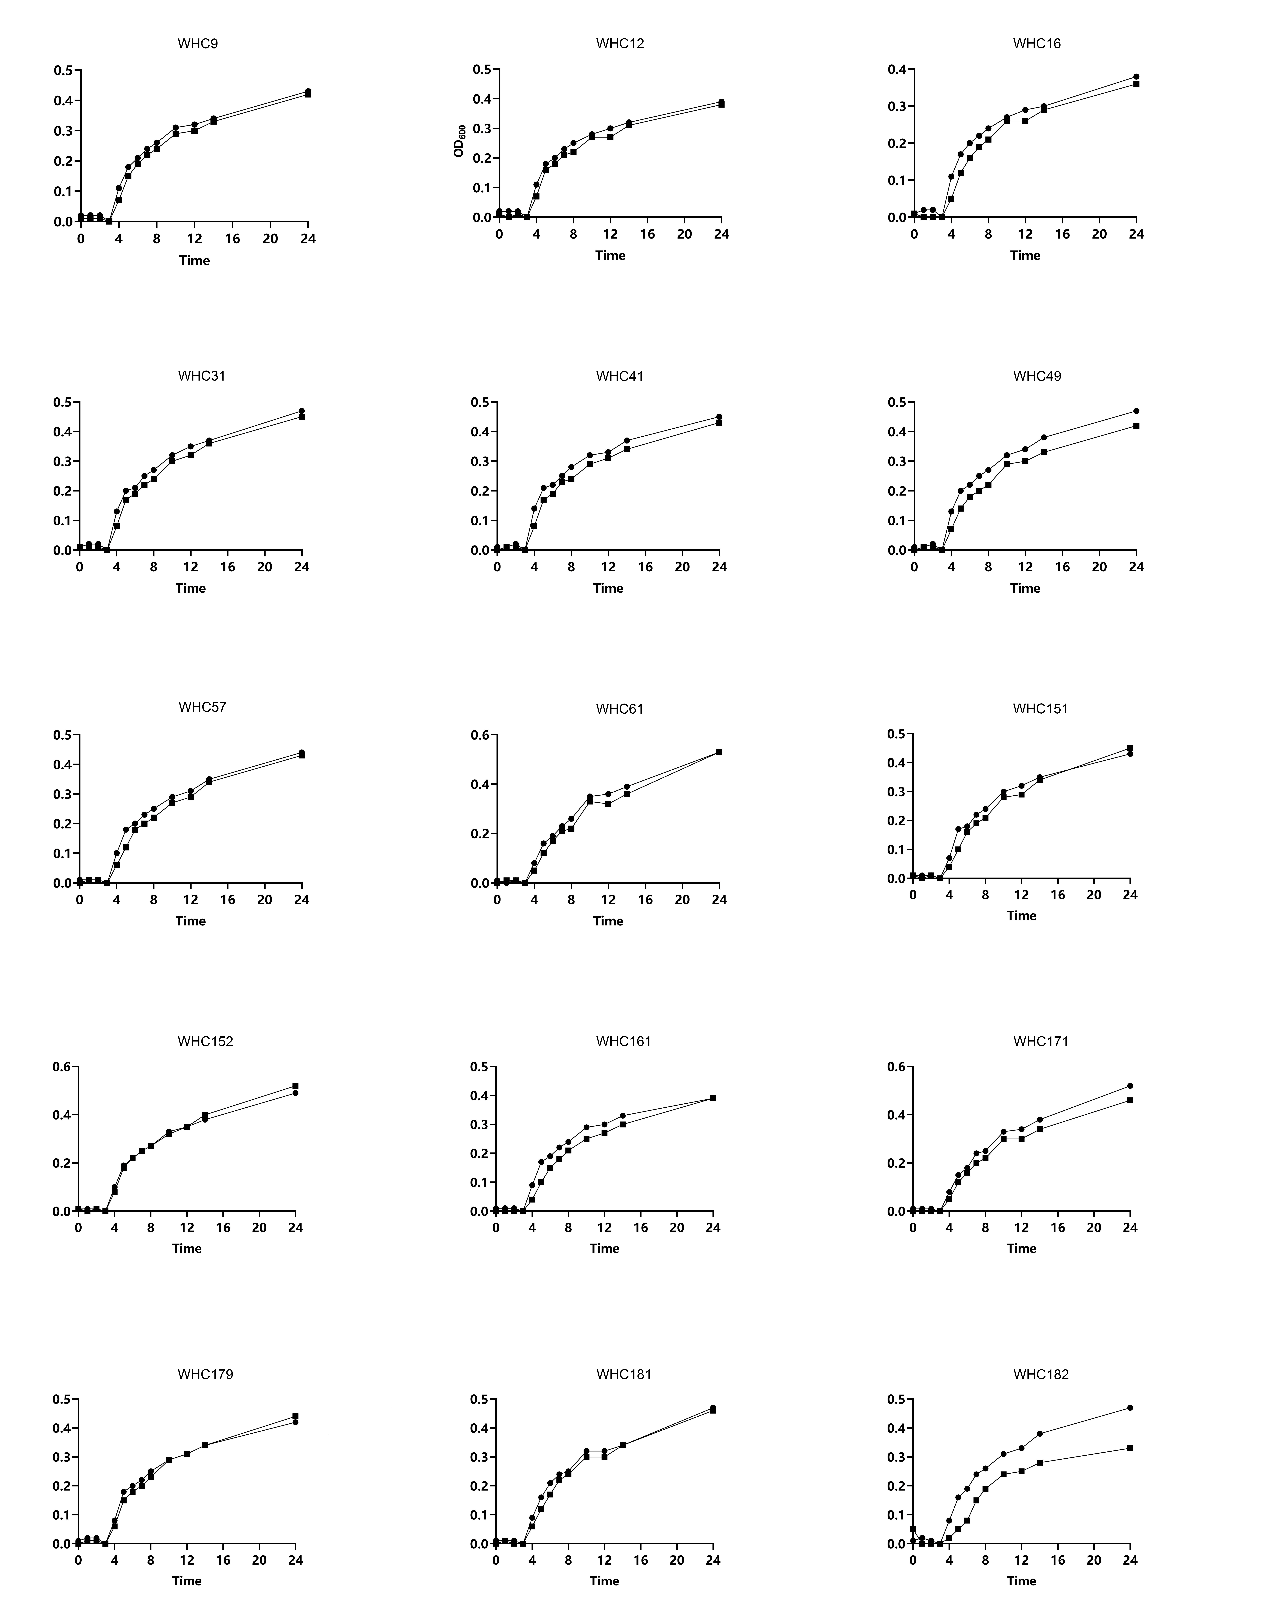


Figure S2 growth curves of the susceptible parent strains and the corresponding mutants. Circle: the parent strains; square: the corresponding mutants.

Reference

[1] Woods, E.J., Cochrane, C.A., and Percival, S.L. (2009). Prevalence of silver resistance genes in bacteria isolated from human and horse wounds. *Vet Microbiol* 138(3-4)**,** 325-329. doi: 10.1016/j.vetmic.2009.03.023.

[2] Elkrewi, E., Randall, C.P., Ooi, N., Cottell, J.L., and O'Neill, A.J. (2017). Cryptic silver resistance is prevalent and readily activated in certain Gram-negative pathogens. *J Antimicrob Chemother* 72(11)**,** 3043-3046. doi: 10.1093/jac/dkx258.

[3] Hamzaoui, Z., Ocampo-Sosa, A., Fernandez Martinez, M., Landolsi, S., Ferjani, S., Maamar, E., et al. (2018). Role of association of OmpK35 and OmpK36 alteration and *bla*ESBL and/or *bla*AmpC genes in conferring carbapenem resistance among non-carbapenemase-producing *Klebsiella pneumoniae*. *Int J Antimicrob Agents* 52(6)**,** 898-905. doi: 10.1016/j.ijantimicag.2018.03.020.
